# Supplementary material for: Interpretation of spring-water temperature variability based on continuous monitoring and numerical modelling of heat transport and water mixing: case study of Czarny Potok spring, Pieniny Mountains, southern Poland
Source: Springer Nature journal article supplement (doi:10.1007/s10040-023-02729-z), 2023-10-19
Supplement: MOESM1 [file 26205334]

Interpretation of spring-water temperature variability based on continuous monitoring and numerical modelling of heat transport and water mixing: case study of Czarny Potok spring, Pieniny Mountains, southern Poland

Tomasz Gruszczyński<sup>1</sup>, Marzena Szostakiewicz-Hołownia<sup>1\*</sup>, Daniel Zaszewski<sup>1</sup>

1. University of Warsaw, Faculty of Geology, Żwirki i Wigury 93, 02-089 Warsaw, Poland

Email: tgruszcz@uw.edu.pl (TG), marzena.szostakiewicz@uw.edu.pl (MSH),

danielzaszewski@uw.edu.pl (DZ)

0000-0002-3621-3644 (TG), ORCID: 0000-0001-7877-1831 (MSH), 0000-0003-0830-

8547 (DZ)

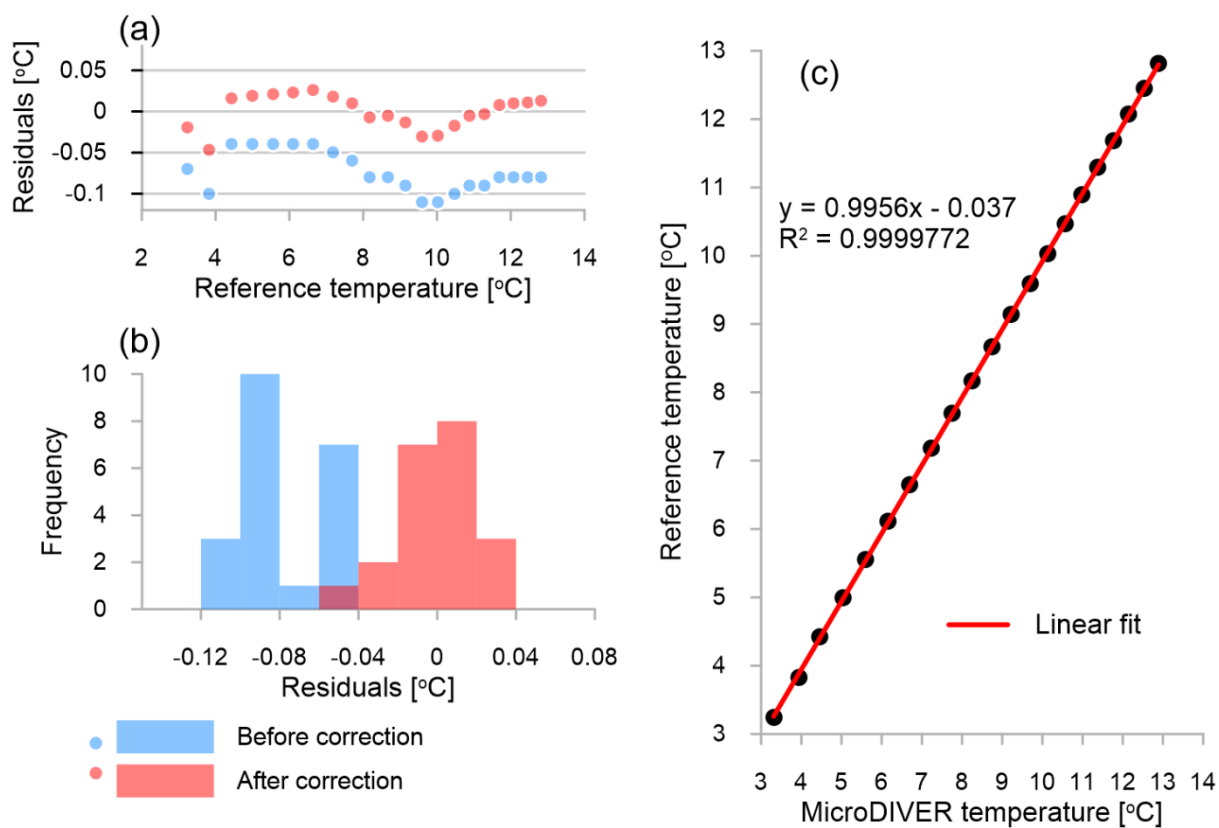

Fig S1. (a) Plot of residuals values to temperature measured by the reference thermometer and (b) histogram of residuals, before and after correction; (c) correlation diagram between temperature values measured by MicroDIVER sensors and the reference thermometer
